# Supplementary material for: CAVER 3.0: A Tool for the Analysis of Transport Pathways in Dynamic Protein Structures
Source: PLOS journal article supplement (doi:10.1371/journal.pcbi.1002708), 2012-10-18
Supplement: S10 (10.1371/journal.pcbi.1002708.s010) [file journal.pcbi.1002708.s010]

**Table S4** Comparison of characteristics of the DhaA p1 tunnel obtained by the analysis of the molecular dynamics trajectory and crystal structures

|                                        | Molecular dynamics trajectory                                                      | PDB-ID 1CQW <sup>a</sup> | PDB-ID 1BN7 <sup>a</sup> | PDB-ID 1BN6 <sup>a</sup> |
|----------------------------------------|------------------------------------------------------------------------------------|--------------------------|--------------------------|--------------------------|
| <b>Mean bottleneck radius[Å]</b>       | 1.4                                                                                | 1.3                      | 1.2                      | 1.2                      |
| <b>Maximum bottleneck radius [Å]</b>   | 2.3                                                                                | 1.3                      | 1.2                      | 1.2                      |
| <b>Bottleneck residues<sup>b</sup></b> | F149 (71 %), C176 (59 %),<br>A172 (50 %), A145 (38 %),<br>K175 (26 %), T148 (23 %) | A145, F149,<br>C176      | A145, F149,<br>C176      | A145, F149,<br>C176      |

<sup>a</sup>crystal structures with introduced substitutions V172A, I209L and G292A and added hydrogen atoms (see Protocol S4);

<sup>b</sup>three residues closest to the tunnel bottleneck; for molecular dynamics, only the most frequent bottleneck residues are listed, together with the percentage of snapshots in which they formed the bottleneck of the p1 tunnel.
