# Supplementary material for: CAVER 3.0: A Tool for the Analysis of Transport Pathways in Dynamic Protein Structures
Source: PLOS journal article supplement (doi:10.1371/journal.pcbi.1002708), 2012-10-18
Supplement: S11 (10.1371/journal.pcbi.1002708.s011) [file journal.pcbi.1002708.s011]

**Table S5** Bottleneck residues of the top ranked tunnels of DhaA identified by CAVER 3.0 in molecular dynamics trajectory using the probe radius of 0.9 Å and the clustering threshold of 3.5.

| Pathway                                | p1a          | p1a'         | p1b          | p2a          | p2b          | p2c          | p3           |
|----------------------------------------|--------------|--------------|--------------|--------------|--------------|--------------|--------------|
| <b>Bottleneck residues<sup>a</sup></b> | F149 (71 %), | A172 (91 %), | V245 (98%),  | L246 (93 %), | W141 (82 %), | P210 (73 %), | I211 (72 %), |
|                                        | C176 (59 %), | F152 (90%),  | F144 (85%),  | L209 (57 %), | V245 (78 %), | I135 (47 %), | I135 (56 %), |
|                                        | A172 (50 %), | F168 (82 %), | P142 (79 %), | W141 (54 %), | L246 (69 %), | R133 (41 %), | W138 (56 %), |
|                                        | A145 (38 %), | A167 (20 %)  | A145 (30 %)  | I135 (36 %), | P142 (59 %)  | P134 (37 %), | W141 (41 %), |
|                                        | K175 (27 %), |              |              | I132 (34 %)  |              |              | T137 (20 %)  |
|                                        | T148 (23 %)  |              |              |              |              |              |              |

<sup>a</sup>three residues closest to the pathway bottleneck were considered in each snapshot; only the most frequent bottleneck residues are listed together with the percentage of snapshots in which they formed the bottleneck.
