# Supplementary material for: CAVER 3.0: A Tool for the Analysis of Transport Pathways in Dynamic Protein Structures
Source: PLoS Comput Biol. 2012 Oct 18;8(10):e1002708. doi: 10.1371/journal.pcbi.1002708 (PMC3475669; doi:10.1371/journal.pcbi.1002708)
Supplement: Table S2 — Characteristics of the pathways identified in 10,000 snapshots of the 10 ns molecular dynamics trajectory of DhaA using the probe radius of 0.9 Å and the clustering threshold of 4.3. (PDF) [file pcbi.1002708.s008.pdf]

**Table S2** Characteristics of the pathways identified in 10,000 snapshots of the 10 ns molecular dynamics trajectory of DhaA using the probe radius of 0.9 Å and the clustering threshold of 4.3

| Rank | Pathway cluster | No. of snapshots <sup>a</sup> | No. of snapshots with an open pathway <sup>b</sup> | Average bottleneck radius <sup>c</sup> [Å] | Maximum bottleneck radius[Å] | Average throughput <sup>c</sup> |
|------|-----------------|-------------------------------|----------------------------------------------------|--------------------------------------------|------------------------------|---------------------------------|
| 1    | p1              | 9960                          | 5291                                               | 1.4                                        | 2.3                          | 0.621                           |
| 2    | p2ab            | 6330                          | 85                                                 | 1.0                                        | 1.8                          | 0.460                           |
| 3    | p2c             | 120                           | 0                                                  | 1.0                                        | 1.2                          | 0.343                           |
| 4    | p3              | 131                           | 0                                                  | 0.9                                        | 1.2                          | 0.304                           |
| 5    | -               | 23                            | 0                                                  | 0.9                                        | 1.0                          | 0.342                           |
| 6    | -               | 28                            | 0                                                  | 0.9                                        | 1.0                          | 0.237                           |
| 7    | -               | 25                            | 0                                                  | 0.9                                        | 1.0                          | 0.259                           |
| 8    | -               | 7                             | 0                                                  | 0.9                                        | 1.0                          | 0.222                           |
| 9    | -               | 3                             | 0                                                  | 0.9                                        | 1.0                          | 0.169                           |
| 10   | -               | 1                             | 0                                                  | 0.9                                        | 0.9                          | 0.127                           |
| 11   | -               | 1                             | 0                                                  | 0.9                                        | 0.9                          | 0.125                           |
| 12   | -               | 2                             | 0                                                  | 0.9                                        | 0.9                          | 0.056                           |
| 13   | -               | 1                             | 0                                                  | 0.9                                        | 0.9                          | 0.090                           |
| 14   | -               | 1                             | 0                                                  | 0.9                                        | 0.9                          | 0.081                           |
| 15   | -               | 1                             | 0                                                  | 0.9                                        | 0.9                          | 0.042                           |

<sup>a</sup>number of snapshots in which a given pathway was identified (bottleneck radius  $\geq 0.9$  Å); <sup>b</sup>number of snapshots in which a given pathway was identified and was open (bottleneck radius  $\geq 1.4$  Å); <sup>c</sup>mean over snapshots in which the given pathway cluster has at least one pathway.
